# Supplementary material for: Nano-CaCO3as template for preparation of disordered large mesoporous carbon with hierarchical porosities
Source: Royal Society of Chemistry journal article supplement (doi:10.1039/b911913b), 2009-12-12
Supplement: b911913b.pdf [file b911913b.pdf]

## **Nano-CaCO<sub>3</sub> as template for preparation of disordered large mesoporous carbon with hierarchical porosities**

Chunrong Zhao,<sup>a</sup> Weikun Wang,<sup>\*b</sup> Zhongbao Yu,<sup>b</sup> Hao Zhang,<sup>b</sup> Anbang Wang,<sup>b</sup>

and Yusheng Yang<sup>a,b</sup>

<sup>a</sup>, Beijing University of Science and Technology, Beijing 100083, China

<sup>b</sup>, Research Institute of Chemical Defense, Beijing 100191, China

### **Supporting information**

In order to demonstrate the reproducibility of the preparation process of LMC materials with CO<sub>2</sub> inner-activation effect, we provided the full adsorption data of 3 samples for LMC-1 ( 50 : 50 ) and carbon yield data of 3 samples for LMC-X (X=1, 2, 3, 4).

Figure S1, shows the Nitrogen adsorption/desorption isotherms, pore-size distributions (calculated by DFT and BJH method respectively) of LMC-1. Table S1 shows the BET surface area and pore volume (according to N<sub>2</sub> adsorption/desorption isotherms) data of 3 samples for LMC-1. There are no much difference among the Nitrogen adsorption/desorption isotherms, pore size distributions, BET surface area and pore volume of 3 samples for LMC-1, which prove the preparation process of LMC is repeatable.

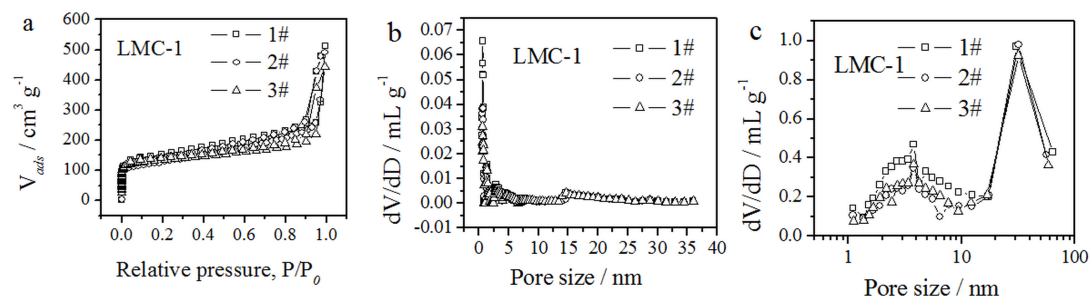

**Figure S1.** (a) Nitrogen adsorption/desorption isotherms of LMC-1. Pore-size distributions of LMC-1 (b) calculated by DFT method, (c) calculated by BJH method.

**Table S1:** Textual parameters of LMC-1 (according to N<sub>2</sub> adsorption/desorption isotherms)

| Samples | S <sub>BET</sub> / m <sup>2</sup> g <sup>-1</sup> | V <sub>tot</sub> / cm <sup>3</sup> g <sup>-1</sup> |
|---------|---------------------------------------------------|----------------------------------------------------|
| 1#      | 518                                               | 0.79                                               |
| 2#      | 503                                               | 0.70                                               |
| 3#      | 512                                               | 0.76                                               |

The carbon yield data of 3 samples for every LMC material are given in Table S2. The carbon yield of LMC samples are affected by the CO<sub>2</sub> inner-activation effect according to the equation: CO<sub>2</sub> + C → 2CO, so the close carbon yield data of 3 samples for LMC-X (X=1,2,3,4) can also prove that the preparation process of LMC is repeatable.

**Table S2:** The carbon yield of LMC samples

| Samples                 | LMC-1 |    |    | LMC-2 |    |    | LMC-3 |    |    | LMC-4 |    |    |
|-------------------------|-------|----|----|-------|----|----|-------|----|----|-------|----|----|
|                         | 1#    | 2# | 3# | 1#    | 2# | 3# | 1#    | 2# | 3# | 1#    | 2# | 3# |
| The yield of carbon (%) | 53    | 51 | 52 | 48    | 49 | 46 | 42    | 40 | 39 | 24    | 26 | 23 |
